# Supplementary material for: Discovery and pharmacophoric characterization of chemokine network inhibitors using phage-display, saturation mutagenesis and computational modelling
Source: PubMed Central journal article supplement (PMC10505172; doi:10.1038/s41467-023-41488-z), 2023-09-16
Supplement: 41467_2023_41488_MOESM1_ESM.pdf [file 41467_2023_41488_MOESM1_ESM.pdf]

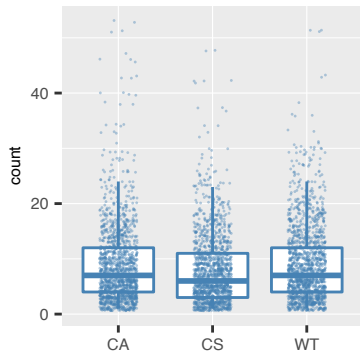

**Supplementary Figure 1. Effect of Cys to Ala or Cys to Ser mutation on library construction.** Box-whisker plot showing effect of mutation on peptide counts in the phage-display library. Y-axis shows counts obtained by next generation sequencing of individual peptides in peptide classes CA (Cys to Ala mutant,  $n = 1586$ ), CS (Cys to Ser mutant,  $n = 1585$ ) and WT (wild-type,  $n = 1607$ ). Individual data points are shown. The box-whisker plot shows the median as centre, 25th and 75th percentile as bounds, and  $1.5 \times$  interquartile range as whiskers.

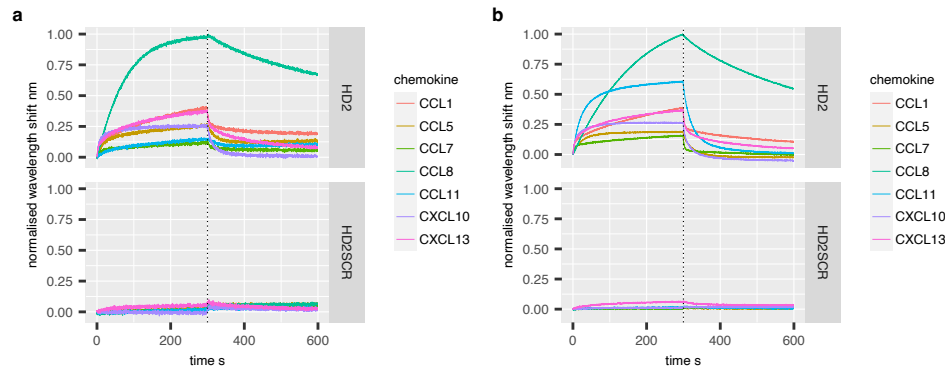

**Supplementary Figure 2. Binding of chemokines to HD2 and HD2SCR.** a, b, Faceted plots of biolayer interferometry (BLI) sensorgrams showing cross-binding of SUMO:HD2 and SUMO:HD2SCR to human chemokines from two

independent experiments. Plots display normalised wavelength shift (y axis; nm) versus time (x-axis; seconds). Vertical dotted line indicates the onset of dissociation. Cross-binding experiments (at  $1 \mu\text{M}$  chemokine concentration) were performed with a panel of chemokines (see Supplementary information Table 3). Specific binders were identified where  $R_{\text{max}}$  (i.e. normalised wavelength shift at 10 s before the end of association) obtained with SUMO:HD2 exceeded 3 times the  $R_{\text{max}}$  obtained with SUMO:HD2SCR. Chemokine names are indicated. Only chemokines that showed reproducible and specific binding in two independent experiments are shown.

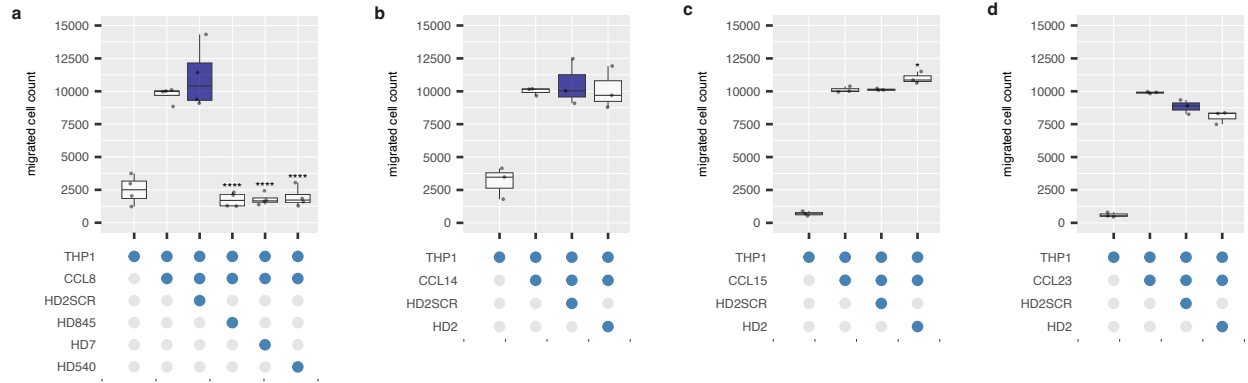

**Supplementary Figure 3. Effect of exemplar peptides on chemotaxis.** a-d, Box-whisker plots showing the effect of the indicated peptides on cell migration induced by indicated human chemokines. All experiments were performed as three technical and three biological replicates, and individual biological replicate data points (mean of technical replicates) are shown. Y-axis in each panel shows migrated cell count normalized to the median value of migrated cells in the presence of chemokine alone, set at 10000 cells. X-axis shows constituents of each experiment as blue-filled dots. Chemokine names are indicated. HD2SCR is a scrambled version of HD2 used as negative control. All peptides were at 10 uM final concentration and chemokines at EC80 doses. Each box-whisker plot shows the median as centre, 25th and 75th percentile as bounds, and 1.5\*interquartile range as whiskers. Statistically significant differences (compared to control, coloured blue), using a two-sided Dunnett's test with correction for multiple comparisons, are indicated by asterisks: \*\*\*\* =  $P \leq 0.0001$ , \*\*\* =  $P \leq 0.001$ , \*\* =  $P \leq 0.01$ , \* =  $P \leq 0.05$ , n= 3 biological replicates in each group. Exact P-values for panel a HD845, HD7 and HD540 are: P=0.00000.

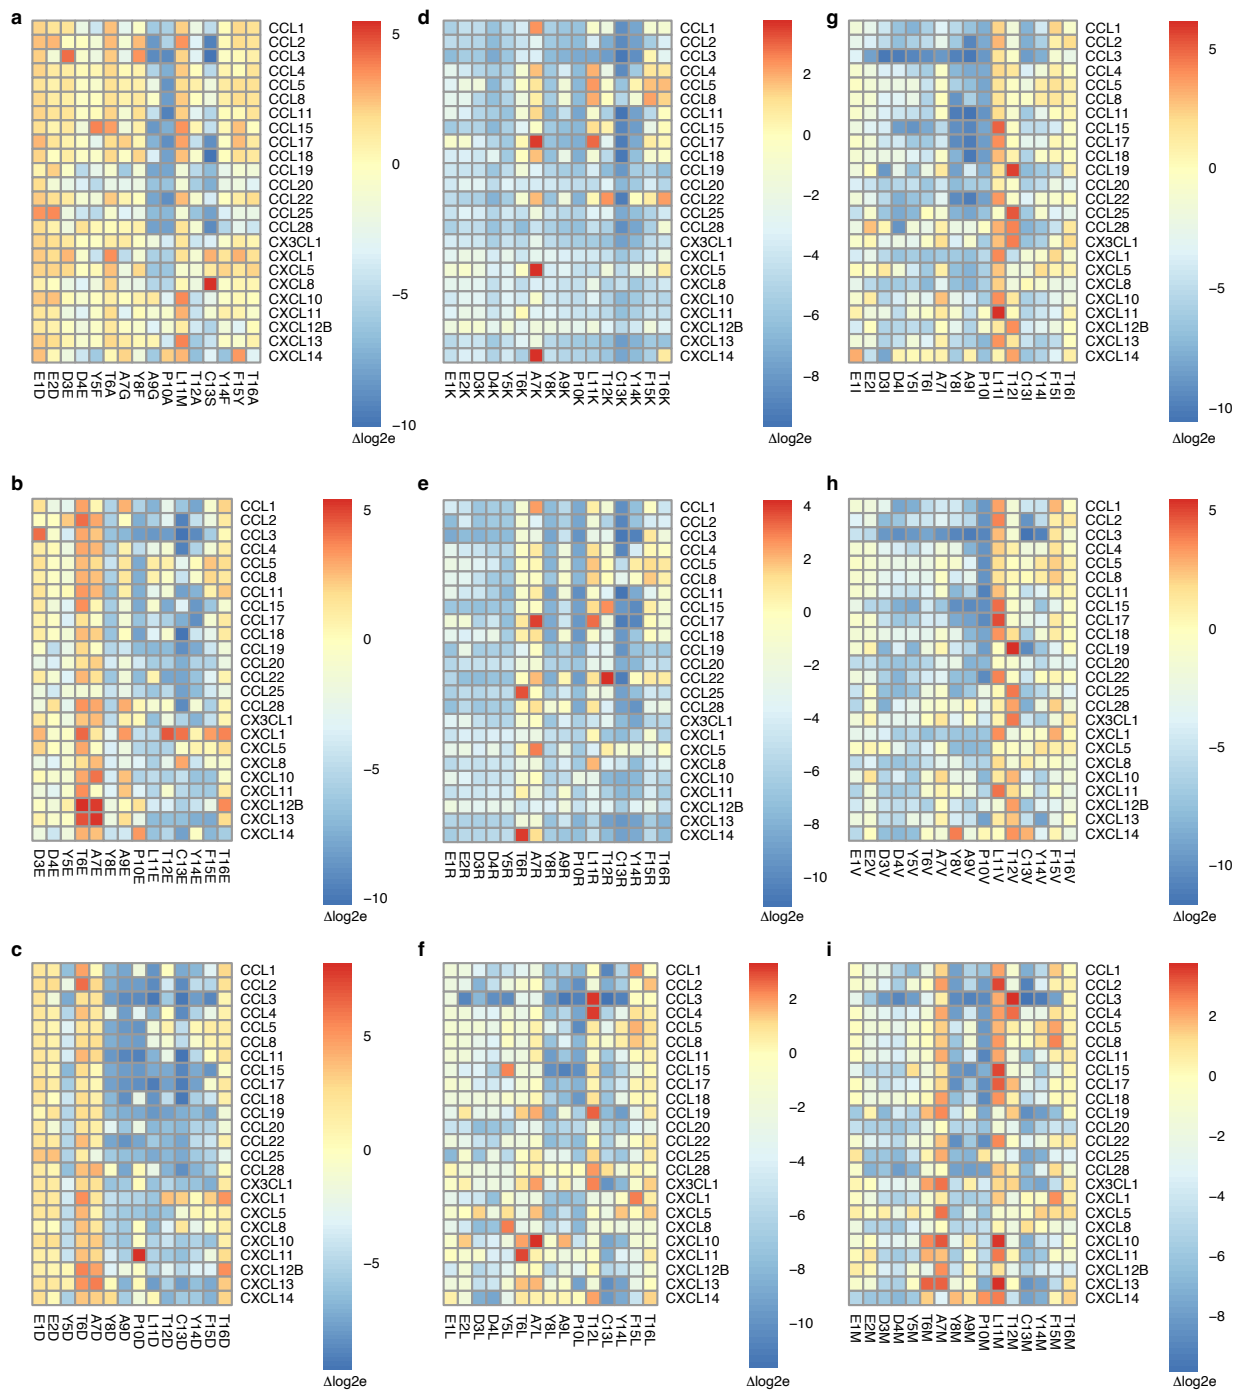

**Supplementary Figure 4. Effect of HD2 mutations on phage binding.** Tileplots of HD2 mutations with tile colour showing  $\Delta\log_2E$ , which is the difference in  $\log_2E$  between the parental wild-type peptide and the mutant variant following phage-display selection. Rows show the selecting chemokine and columns the mutation. Scale bar shows  $\Delta\log_2E$  values. **a**, Conservative residue substitutions **b,c**, Anionic residue substitutions. **d,e**, Cationic residue substitutions. **f-i**, Hydrophobic residue substitutions.

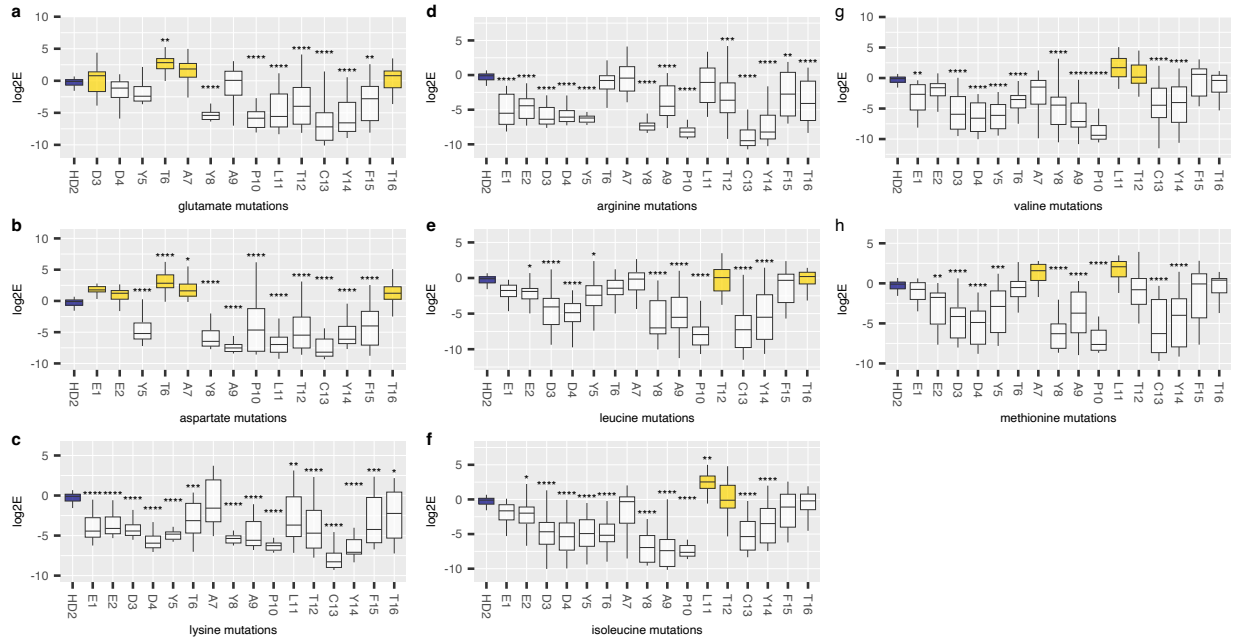

**Supplementary Figure 5. Effect of HD2 mutations on phage binding.** Box-whisker plots showing impact of HD2 residue substitutions by glutamic acid (a), aspartic acid (b), lysine (c), arginine (d), leucine (e), isoleucine (f), valine (g) and methionine (h) residues respectively (X-axis) upon log<sub>2</sub>E (Y-axis). Each box-whisker plot shows the median as centre, 25th and 75th percentile as bounds, and 1.5\*interquartile range as whiskers. Statistically significant differences (compared to control, coloured blue), using a two-sided Dunnett's test with correction for multiple comparisons, are indicated by asterisks: \*\*\*\* =  $P \leq 0.0001$ , \*\*\* =  $P \leq 0.001$ , \*\* =  $P \leq 0.01$ , \* =  $P \leq 0.05$ ,  $n = 24$  per group. Exact P values are provided in Supplementary Table 5. Boxes showing a positive value for difference from control (identified from Dunnett's test) are shown as yellow.

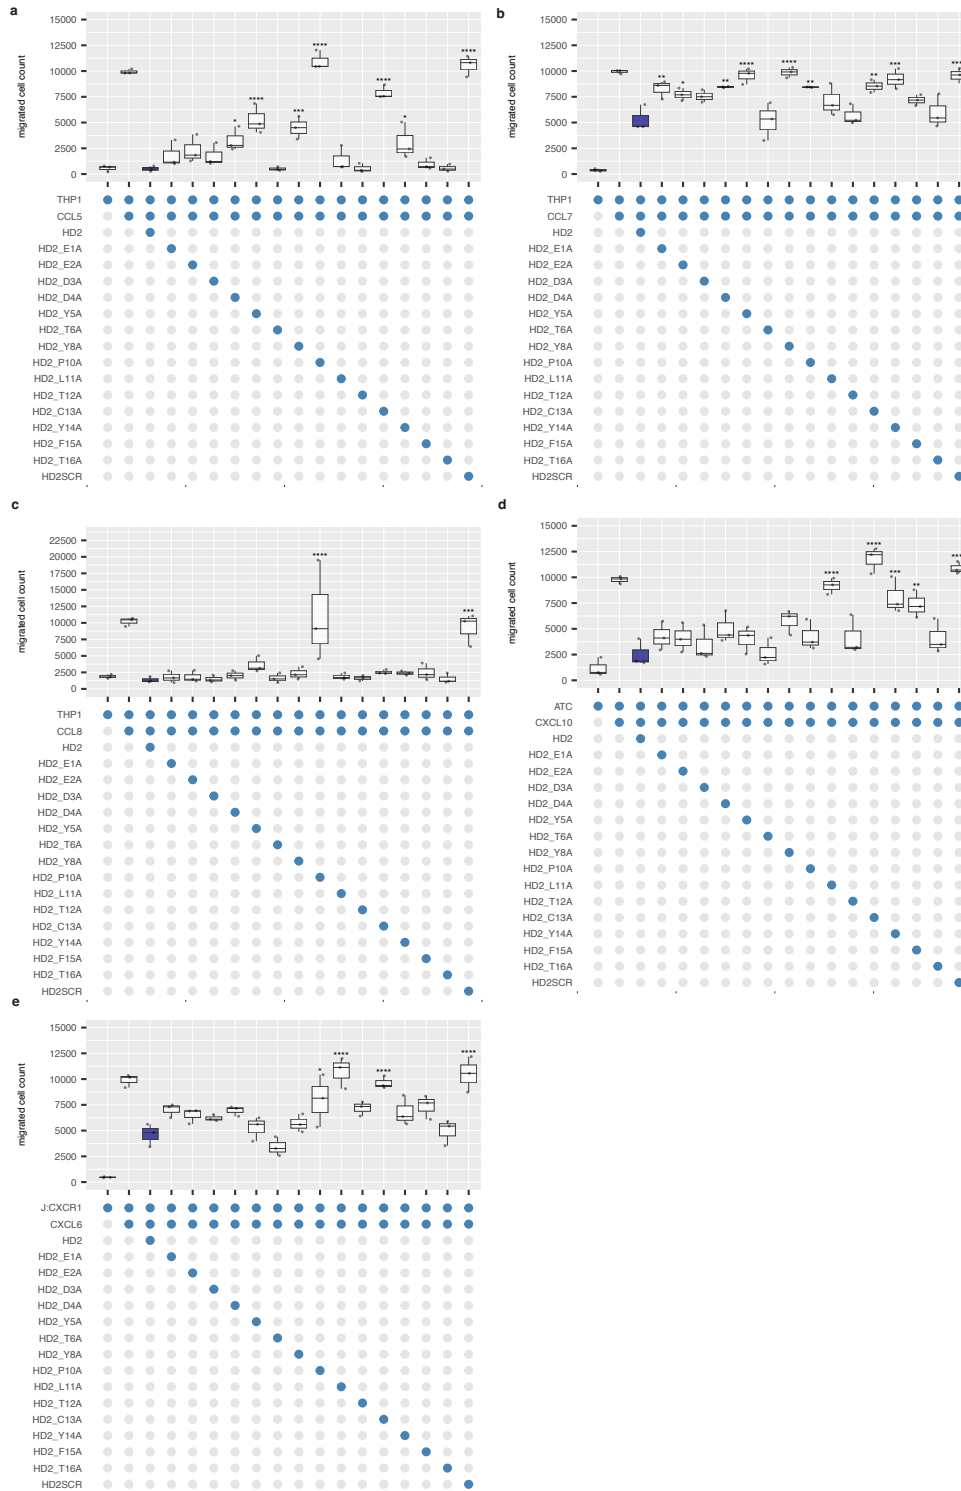

**Supplementary Figure 6. Effect of HD2 alanine mutations on chemotaxis. a-e,** Box-whisker plots showing the effect of the indicated alanine mutant peptides on cell migration induced by indicated human chemokines. All experiments were performed as three technical and three biological replicates, and individual biological replicate data points (mean of technical replicates) are shown. Y-axis in each panel shows migrated cell count normalized to the median value of migrated cells in the presence of chemokine alone, set at 10000 cells. X-axis shows constituents of each experiment as blue-filled dots. Chemokine names are indicated. HD2 SCR is a scrambled version of HD2. All peptides were at 10  $\mu$ M final concentration and chemokines at EC80 doses. Each box-whisker plot shows the median as centre, 25th and

75th percentile as bounds, and 1.5\*interquartile range as whiskers. Statistically significant differences (compared to parental peptide HD2, coloured blue), using a two-sided Dunnett's test with correction for multiple comparisons, are indicated by asterisks: \*\*\*\* =  $P \leq 0.0001$ , \*\*\* =  $P \leq 0.001$ , \*\* =  $P \leq 0.01$ , \* =  $P \leq 0.05$ ,  $n = 3$  biological replicates in each group. Exact P values are reported in Supplementary Table 6.

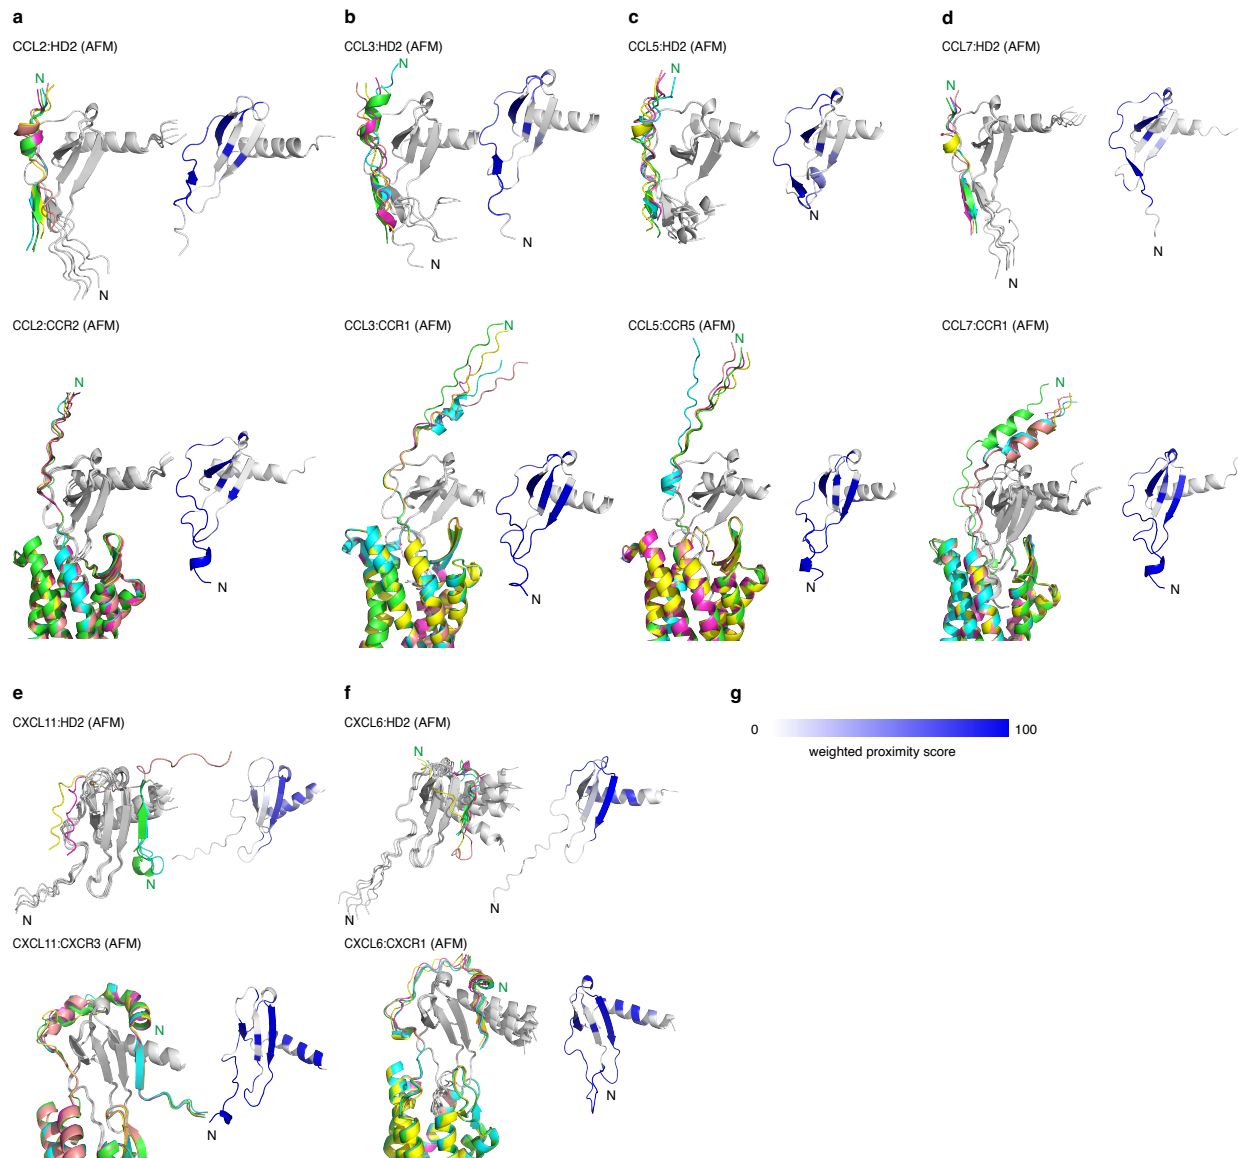

**Supplementary Figure 7. Predicted binding modes of HD2 and receptors to chemokines using AlphaFold2-Multimer.** **a-f**, *Left panels*: Ribbon diagrams showing predicted poses for chemokine:HD2 (*top*) and for chemokine:receptor (*bottom*). Chemokines are in gray, and the peptide or receptor in colour, with the top-ranked pose coloured green. *Right panels*: Corresponding heatmaps of weighted proximity scores mapped onto ribbon diagrams of the chemokine. **g**, Scale bar for weighted proximity score. *Abbreviation*: N: N-terminal residue of the top-ranked pose. Source data are provided as a Source Data file.

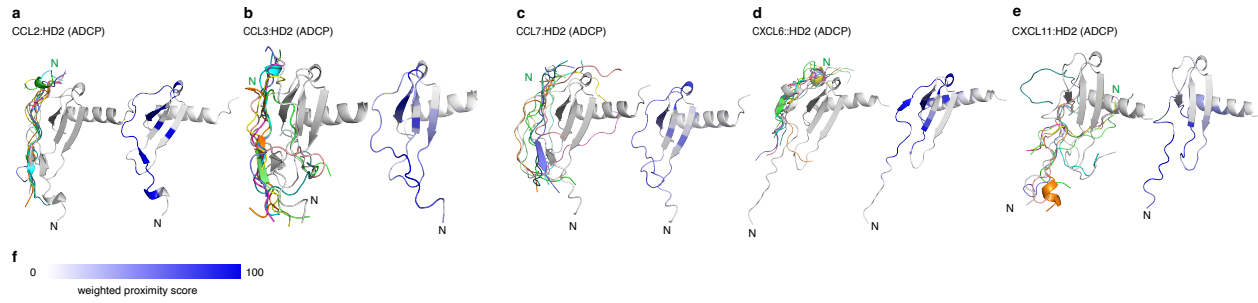

**Supplementary Figure 8. Predicted binding modes of HD2 to chemokines using AutoDock CrankPep.** **a-e**, *Left panels*: Ribbon diagrams showing predicted poses for chemokine. Chemokines are in gray, and the peptide in colour, with the top-ranked pose coloured green. *Right panels*: Corresponding heatmaps of weighted proximity scores mapped onto ribbon diagrams of the chemokine. **f**, Scale bar for weighted proximity score. *Abbreviation*: N: N-terminal residue of the top-ranked pose. Source data are provided as a Source Data file.





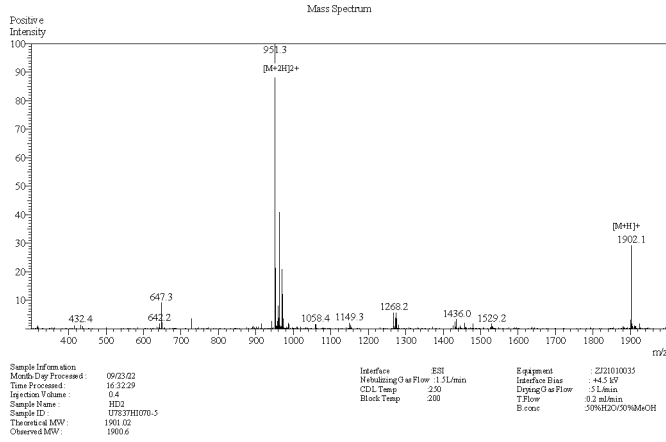

**Supplementary Figure 10. Peptide molecular weight.** Peptide mass spectrometry data (X-axis m/z ratio, Y-axis positive intensity) provided by Genscript showing theoretical and observed molecular weights of peptide HD2.

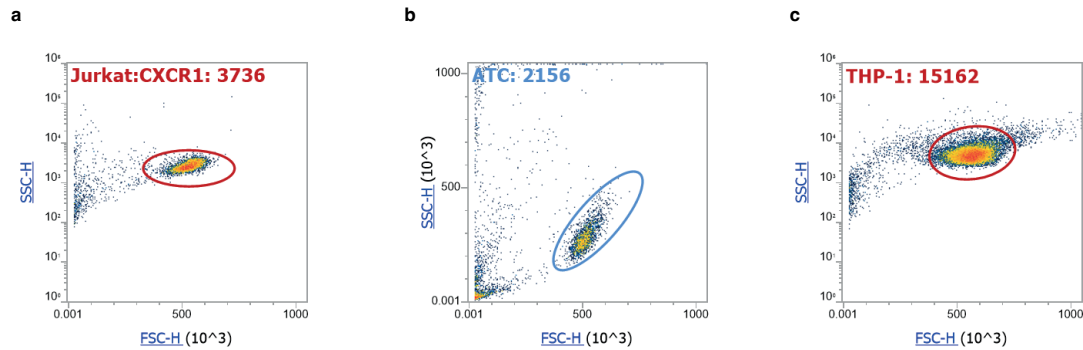

**Supplementary Figure 11. Gating strategies for cell counts using flow cytometry.** **a**, Jurkat CXCR1 cells (manuscript figures 5j, 6e, 8a) **b**, Activated T-cells (manuscript figures 5g, h, 6d, 8a), **c**, THP1 cells (manuscript figures 5a-e, 6a-c,g,h, 8a). Pseudo-color dot-plots of SSC-H (side-scatter height y-axis) versus FSC-H (forward-scatter height, x-axis) are shown in each case. The gates are drawn based on previously determined live cell populations and are identical between control and test experiments.

***Supplementary Table 1. Human Biotinylated Bait Sources***

| Bait    | Supplier        | Supplier Code |
|---------|-----------------|---------------|
| C5A     | Almac           | CB-90         |
| CCL1    | Almac           | CB-07         |
| CCL11   | Almac           | CB-03         |
| CCL15   | Almac           | CB-19         |
| CCL17   | Almac           | CB-16         |
| CCL18   | Almac           | CB-21         |
| CCL19   | Almac           | CB-06         |
| CCL2    | Almac           | CB-02         |
| CCL20   | Almac           | CB-05         |
| CCL22   | Almac           | CB-04         |
| CCL25   | Almac           | CB-15         |
| CCL28   | Almac           | CB-20         |
| CCL3    | Almac           | CB-01         |
| CCL4    | Almac           | CB-23         |
| CCL5    | Almac           | CB-08         |
| CCL8    | Almac           | CB-18         |
| CX3CL1  | Almac           | CB-14         |
| CXCL1   | Protein Foundry | PFP029TBL     |
| CXCL10  | Almac           | CB-10         |
| CXCL11  | Almac           | CB-11         |
| CXCL11  | Almac           | CB-13         |
| CXCL12  | Almac           | CB-11         |
| CXCL12B | Almac           | CB-22         |
| CXCL13  | Almac           | CB-12         |
| CXCL14  | Almac           | CB-17         |
| CXCL5   | Protein Foundry | PFP004TBL     |
| CXCL8   | Almac           | CB-09         |

**Supplementary Table 2. Peptide Sequences and Originating Proteins.**

| Peptide ID | Peptide Sequence | UniProtID:GenBank Accession                       |
|------------|------------------|---------------------------------------------------|
| HD990      | ELNCWHDMPPPVSTDT | AMA01:AEO36603.1                                  |
| HD2045     | KVANRMQGNVTYTCPV | ATR02:A0A023G9N5                                  |
| HD4578     | YDYTEGCPFVVLGNGT | E1180_AMBTT:A0A023G6B6                            |
| HD4357     | VLKLLGCHYFCNGTLC | E1243_AMBAM:A0A0C9S461                            |
| HD540      | DEDYEDFFKPVTCYFA | EV672_RHIPC:L7MC74                                |
| HD744      | DYEDFFKPVTCYFANS | EV672_RHIPC:L7MC74                                |
| HD845      | EDEDYEDFFKPVTCYF | EV672_RHIPC:L7MC74                                |
| HD883      | EDYEDFFKPVTCYFAN | EV672_RHIPC:L7MC74                                |
| HD1054     | ERKVWDRMTPMLWYES | EV974_AMBCJ:A0A023FDY8                            |
| HD2312     | LTDGTAAYVVERKVWD | EV974_AMBCJ:A0A023FDY8,<br>EV546_AMBCJ:A0A023FBW7 |
| HD2313     | LTDGTACYVVERKVWD | EV974_AMBCJ:A0A023FDY8,<br>EV546_AMBCJ:A0A023FBW7 |
| HD2314     | LTDGTASYVVERKVWD | EV974_AMBCJ:A0A023FDY8,<br>EV546_AMBCJ:A0A023FBW7 |
| HD3838     | TDGTACYVVERKVWDR | EV974_AMBCJ:A0A023FDY8,<br>EV546_AMBCJ:A0A023FBW7 |
| HD3839     | TDGTASYVVERKVWDR | EV974_AMBCJ:A0A023FDY8,<br>EV546_AMBCJ:A0A023FBW7 |
| HD4670     | YPCYNLTEHQAKNLTT | EV991_AMBCJ:A0A023FFD0                            |
| HD2        | EEDDYTAYAPLTCYFT | EVA4_RHISA:P0C8E9                                 |
| HD2133     | LEEEDDYTAYAPLTAY | EVA4_RHISA:P0C8E9                                 |
| HD2134     | LEEEDDYTAYAPLTCY | EVA4_RHISA:P0C8E9                                 |
| HD2135     | LEEEDDYTAYAPLTSY | EVA4_RHISA:P0C8E9                                 |
| HD534      | DDYTAYAPLTCYFTNS | EVA4_RHISA:P0C8E9                                 |
| HD612      | DLEEEDDYTAYAPLTS | EVA4_RHISA:P0C8E9                                 |
| HD7        | EEEDDYTAYAPLTCYF | EVA4_RHISA:P0C8E9                                 |
| HD842      | EDDYTAYAPLTCYFTN | EVA4_RHISA:P0C8E9                                 |
| HD900      | EEDDYTAYAPLTAYFT | EVA4_RHISA:P0C8E9                                 |
| HD901      | EEDDYTAYAPLTSYFT | EVA4_RHISA:P0C8E9                                 |
| HD908      | EEEDDYTAYAPLTAYF | EVA4_RHISA:P0C8E9                                 |
| HD909      | EEEDDYTAYAPLTSYF | EVA4_RHISA:P0C8E9                                 |
| HD1267     | GAPVVGIGGLDNKTWH | IHO01:A0A223FZ07                                  |

| Peptide ID | Peptide Sequence | UniProtID:GenBank Accession |
|------------|------------------|-----------------------------|
| HD3398     | SCVAKVDSLSKEEATV | IRI01:JAA70749.1            |
| HD4650     | YNIVITKNKTLVVNCT | RPU02:JAA60771.1            |

**Supplementary Table 3. Human Chemokine Panel Sources. BLI = Biolayer Interferometry, C = Chemotaxis**

| Chemokine | Supplier  | Supplier Code | Assay  |
|-----------|-----------|---------------|--------|
| CCL1      | Peprotech | 300-37        | BLI    |
| CCL11     | Peprotech | 300-21        | BLI    |
| CCL13     | Peprotech | 300-24        | BLI    |
| CCL14     | Peprotech | 300-38        | BLI    |
| CCL14     | Peprotech | 300-38B       | C      |
| CCL15     | Novus     | NBP2-35043    | C, BLI |
| CCL16     | Peprotech | 300-44        | BLI    |
| CCL17     | Peprotech | 300-30        | BLI    |
| CCL18     | Peprotech | 300-34        | BLI    |
| CCL19     | Peprotech | 300-29B       | BLI    |
| CCL2      | Peprotech | 300-04        | C, BLI |
| CCL20     | Peprotech | 300-29A       | BLI    |
| CCL21     | Peprotech | 300-35A       | BLI    |
| CCL22     | Peprotech | 300-36A       | BLI    |
| CCL23     | Biologend | 587002        | C, BLI |
| CCL24     | Peprotech | 300-33        | BLI    |
| CCL25     | Peprotech | 300-45        | BLI    |
| CCL26     | Peprotech | 300-48        | BLI    |
| CCL27     | Peprotech | 300-54        | BLI    |
| CCL28     | Peprotech | 300-57        | BLI    |
| CCL3      | Peprotech | 300-08        | C, BLI |
| CCL3L1    | Peprotech | 300-56        | BLI    |
| CCL4      | Peprotech | 300-09        | BLI    |
| CCL4L1    | Peprotech | 300-58        | BLI    |
| CCL5      | Peprotech | 300-06        | C, BLI |
| CCL7      | Peprotech | 300-17        | C, BLI |
| CCL8      | Peprotech | 300-15        | C, BLI |
| CX3CL1    | Peprotech | 300-31        | BLI    |
| CXCL1     | Peprotech | 300-11        | BLI    |
| CXCL10    | Peprotech | 300-12        | C, BLI |

| Chemokine | Supplier  | Supplier Code | Assay  |
|-----------|-----------|---------------|--------|
| CXCL11    | Peprotech | 300-46        | C, BLI |
| CXCL12    | Peprotech | 300-28A       | BLI    |
| CXCL12B   | Peprotech | 300-28B       | BLI    |
| CXCL13    | Peprotech | 300-47        | BLI    |
| CXCL14    | Peprotech | 300-50        | BLI    |
| CXCL16    | Peprotech | 300-55        | BLI    |
| CXCL2     | Peprotech | 300-39        | BLI    |
| CXCL3     | Peprotech | 300-40        | BLI    |
| CXCL4     | Peprotech | 300-16        | BLI    |
| CXCL5     | Peprotech | 300-22        | BLI    |
| CXCL6     | Peprotech | 300-41        | C, BLI |
| CXCL7     | Peprotech | 300-14        | BLI    |
| CXCL8     | Peprotech | 200-08        | BLI    |
| CXCL9     | Peprotech | 300-26        | BLI    |

**Supplementary Table 4. Biolayer Interferometry Analysis. Expt ID indicates independent experiments.  $K_D$ [M]: Mean  $K_D$  (molar). SE: standard error. N: number of dose responses with good fits used to calculate summary statistics. sHD2 is SUMO:HD2.**

| Expt ID | Sample | Analyte | $K_D$ [M] | $K_D$ :SE [M] | N |
|---------|--------|---------|-----------|---------------|---|
| E12     | sHD2   | CCL8    | 1.425e-07 | 4.94e-08      | 5 |
| E32     | sHD2   | CCL8    | 8.49e-08  | 1.90e-08      | 4 |

**Supplementary Table 5. Exact P values for phage-display mutagenesis analyses of scanning mutants, comparisons to HD2 as negative control**

| Residue | Substitution type | Number of samples | P value  |
|---------|-------------------|-------------------|----------|
| E2      | alanine           | 24                | 8.46e-03 |
| D3      | alanine           | 24                | 3.42e-05 |
| D4      | alanine           | 24                | 1.01e-10 |
| Y5      | alanine           | 24                | 2.93e-11 |
| Y8      | alanine           | 24                | 2.34e-11 |
| P10     | alanine           | 24                | 3.49e-13 |
| L11     | alanine           | 24                | 1.71e-02 |
| T12     | alanine           | 24                | 1.97e-03 |
| C13     | alanine           | 24                | 4.44e-16 |
| Y14     | alanine           | 24                | 3.94e-11 |
| Y5      | anionic           | 48                | 4.64e-04 |
| T6      | anionic           | 48                | 9.19e-05 |
| A7      | anionic           | 48                | 3.82e-02 |
| Y8      | anionic           | 48                | 1.22e-11 |
| A9      | anionic           | 48                | 2.79e-06 |
| P10     | anionic           | 48                | 3.12e-09 |
| L11     | anionic           | 48                | 4.37e-13 |
| T12     | anionic           | 48                | 1.29e-07 |
| C13     | anionic           | 48                | 0.00e+00 |
| Y14     | anionic           | 48                | 1.39e-11 |
| F15     | anionic           | 48                | 1.69e-05 |
| E1      | arginine          | 24                | 1.31e-10 |
| E2      | arginine          | 24                | 3.83e-09 |
| D3      | arginine          | 24                | 6.86e-14 |
| D4      | arginine          | 24                | 3.95e-13 |
| Y5      | arginine          | 24                | 1.89e-15 |
| Y8      | arginine          | 24                | 0.00e+00 |
| A9      | arginine          | 24                | 6.47e-06 |
| P10     | arginine          | 24                | 0.00e+00 |
| T12     | arginine          | 24                | 1.84e-04 |

| Residue | Substitution type | Number of samples | P value  |
|---------|-------------------|-------------------|----------|
| C13     | arginine          | 24                | 0.00e+00 |
| Y14     | arginine          | 24                | 0.00e+00 |
| F15     | arginine          | 24                | 7.50e-03 |
| T16     | arginine          | 24                | 1.84e-05 |
| Y5      | aspartate         | 24                | 4.12e-08 |
| T6      | aspartate         | 24                | 3.57e-05 |
| A7      | aspartate         | 24                | 3.75e-02 |
| Y8      | aspartate         | 24                | 4.76e-11 |
| A9      | aspartate         | 24                | 0.00e+00 |
| P10     | aspartate         | 24                | 9.42e-07 |
| L11     | aspartate         | 24                | 3.66e-15 |
| T12     | aspartate         | 24                | 5.40e-08 |
| C13     | aspartate         | 24                | 1.11e-16 |
| Y14     | aspartate         | 24                | 2.87e-09 |
| F15     | aspartate         | 24                | 7.02e-06 |
| E1      | cationic          | 48                | 4.50e-12 |
| E2      | cationic          | 48                | 2.38e-08 |
| D3      | cationic          | 48                | 2.35e-14 |
| D4      | cationic          | 48                | 0.00e+00 |
| Y5      | cationic          | 48                | 0.00e+00 |
| T6      | cationic          | 48                | 3.34e-02 |
| Y8      | cationic          | 48                | 0.00e+00 |
| A9      | cationic          | 48                | 4.93e-11 |
| P10     | cationic          | 48                | 0.00e+00 |
| L11     | cationic          | 48                | 2.60e-02 |
| T12     | cationic          | 48                | 6.56e-08 |
| C13     | cationic          | 48                | 0.00e+00 |
| Y14     | cationic          | 48                | 0.00e+00 |
| F15     | cationic          | 48                | 1.96e-04 |
| T16     | cationic          | 48                | 1.22e-04 |
| E1D     | conservative      | 24                | 4.79e-02 |



| Residue | Substitution type | Number of samples | P value  |
|---------|-------------------|-------------------|----------|
| A9G     | conservative      | 24                | 3.50e-12 |
| P10A    | conservative      | 24                | 1.11e-16 |
| T12A    | conservative      | 24                | 3.21e-04 |
| C13S    | conservative      | 24                | 6.10e-10 |
| T6      | glutamate         | 24                | 2.30e-03 |
| Y8      | glutamate         | 24                | 6.47e-09 |
| P10     | glutamate         | 24                | 6.49e-09 |
| L11     | glutamate         | 24                | 4.62e-07 |
| T12     | glutamate         | 24                | 5.56e-05 |
| C13     | glutamate         | 24                | 3.57e-13 |
| Y14     | glutamate         | 24                | 1.15e-09 |
| F15     | glutamate         | 24                | 1.66e-03 |
| E1      | hydrophobic       | 96                | 1.27e-02 |
| E2      | hydrophobic       | 96                | 3.24e-03 |
| D3      | hydrophobic       | 96                | 8.93e-14 |
| D4      | hydrophobic       | 96                | 0.00e+00 |
| Y5      | hydrophobic       | 96                | 2.73e-10 |
| T6      | hydrophobic       | 96                | 8.30e-04 |
| Y8      | hydrophobic       | 96                | 0.00e+00 |
| A9      | hydrophobic       | 96                | 0.00e+00 |
| P10     | hydrophobic       | 96                | 0.00e+00 |
| L11     | hydrophobic       | 72                | 7.66e-03 |
| C13     | hydrophobic       | 96                | 2.22e-16 |
| Y14     | hydrophobic       | 96                | 1.32e-09 |
| E2      | isoleucine        | 24                | 4.22e-02 |
| D3      | isoleucine        | 24                | 2.52e-09 |
| D4      | isoleucine        | 24                | 2.55e-11 |
| Y5      | isoleucine        | 24                | 1.11e-09 |
| T6      | isoleucine        | 24                | 5.00e-09 |
| Y8      | isoleucine        | 24                | 0.00e+00 |
| A9      | isoleucine        | 24                | 0.00e+00 |

| Residue | Substitution type | Number of samples | P value  |
|---------|-------------------|-------------------|----------|
| P10     | isoleucine        | 24                | 0.00e+00 |
| L11     | isoleucine        | 24                | 3.20e-03 |
| C13     | isoleucine        | 24                | 1.85e-10 |
| Y14     | isoleucine        | 24                | 9.15e-05 |
| E2      | leucine           | 24                | 3.37e-02 |
| D3      | leucine           | 24                | 1.14e-07 |
| D4      | leucine           | 24                | 2.66e-09 |
| Y5      | leucine           | 24                | 1.08e-02 |
| Y8      | leucine           | 24                | 6.68e-13 |
| A9      | leucine           | 24                | 9.59e-09 |
| P10     | leucine           | 24                | 0.00e+00 |
| C13     | leucine           | 24                | 5.55e-16 |
| Y14     | leucine           | 24                | 3.43e-09 |
| E1      | lysine            | 24                | 7.73e-08 |
| E2      | lysine            | 24                | 3.38e-06 |
| D3      | lysine            | 24                | 3.74e-08 |
| D4      | lysine            | 24                | 2.66e-15 |
| Y5      | lysine            | 24                | 4.61e-11 |
| T6      | lysine            | 24                | 2.04e-04 |
| Y8      | lysine            | 24                | 9.76e-14 |
| A9      | lysine            | 24                | 4.71e-11 |
| P10     | lysine            | 24                | 0.00e+00 |
| L11     | lysine            | 24                | 3.04e-03 |
| T12     | lysine            | 24                | 1.22e-08 |
| C13     | lysine            | 24                | 0.00e+00 |
| Y14     | lysine            | 24                | 0.00e+00 |
| F15     | lysine            | 24                | 2.93e-04 |
| T16     | lysine            | 24                | 3.09e-02 |
| E2      | methionine        | 24                | 6.31e-03 |
| D3      | methionine        | 24                | 4.57e-07 |
| D4      | methionine        | 24                | 8.36e-10 |

| Residue | Substitution type | Number of samples | P value  |
|---------|-------------------|-------------------|----------|
| Y5      | methionine        | 24                | 5.95e-04 |
| Y8      | methionine        | 24                | 8.44e-14 |
| A9      | methionine        | 24                | 2.73e-05 |
| P10     | methionine        | 24                | 1.22e-15 |
| C13     | methionine        | 24                | 8.84e-11 |
| Y14     | methionine        | 24                | 1.21e-06 |
| E1      | valine            | 24                | 1.37e-03 |
| D3      | valine            | 24                | 8.51e-12 |
| D4      | valine            | 24                | 5.66e-14 |
| Y5      | valine            | 24                | 1.49e-13 |
| T6      | valine            | 24                | 1.24e-05 |
| Y8      | valine            | 24                | 1.01e-08 |
| A9      | valine            | 24                | 9.38e-14 |
| P10     | valine            | 24                | 0.00e+00 |
| C13     | valine            | 24                | 4.44e-07 |
| Y14     | valine            | 24                | 9.37e-06 |

**Supplementary Table 6. Exact P values for cell migration experiments with alanine-scanning mutants, comparisons to HD2 as negative control**

| Experiment components     | Number of samples | P value  |
|---------------------------|-------------------|----------|
| THP1, CCL5, HD2_D4A       | 3                 | 1.65e-02 |
| THP1, CCL5, HD2_Y5A       | 3                 | 7.00e-06 |
| THP1, CCL5, HD2_Y8A       | 3                 | 2.24e-04 |
| THP1, CCL5, HD2_P10A      | 3                 | 0.00e+00 |
| THP1, CCL5, HD2_C13A      | 3                 | 0.00e+00 |
| THP1, CCL5, HD2_Y14A      | 3                 | 3.29e-02 |
| THP1, CCL5, HD2SCR        | 3                 | 0.00e+00 |
| THP1, CCL7, HD2_E1A       | 3                 | 5.61e-03 |
| THP1, CCL7, HD2_E2A       | 3                 | 3.63e-02 |
| THP1, CCL7, HD2_D4A       | 3                 | 2.94e-03 |
| THP1, CCL7, HD2_Y5A       | 3                 | 3.70e-05 |
| THP1, CCL7, HD2_Y8A       | 3                 | 1.30e-05 |
| THP1, CCL7, HD2_P10A      | 3                 | 3.19e-03 |
| THP1, CCL7, HD2_C13A      | 3                 | 2.12e-03 |
| THP1, CCL7, HD2_Y14A      | 3                 | 1.37e-04 |
| THP1, CCL7, HD2SCR        | 3                 | 2.50e-05 |
| THP1, CCL8, HD2_P10A      | 3                 | 1.30e-05 |
| THP1, CCL8, HD2SCR        | 3                 | 4.56e-04 |
| ATC, CXCL10, HD2_L11A     | 3                 | 8.00e-06 |
| ATC, CXCL10, HD2_C13A     | 3                 | 0.00e+00 |
| ATC, CXCL10, HD2_Y14A     | 3                 | 2.35e-04 |
| ATC, CXCL10, HD2_F15A     | 3                 | 1.43e-03 |
| ATC, CXCL10, HD2SCR       | 3                 | 0.00e+00 |
| J: CXCR1, CXCL6, HD2_P10A | 3                 | 1.19e-02 |
| J: CXCR1, CXCL6, HD2_L11A | 3                 | 1.00e-06 |
| J: CXCR1, CXCL6, HD2_C13A | 3                 | 5.80e-05 |
| J: CXCR1, CXCL6, HD2SCR   | 3                 | 2.00e-06 |

**Supplementary Table 7. Rosetta cross-interface binding energy for chemokine:HD2 peptide complexes.  $dG_{cross}$  = cross-interface binding energy, kcal/mol; ADCP = AutoDock Crankpep; AFM = AlphaFold2-Multimer.**

| Method | Chemokine | Rank | $dG_{cross}$ |
|--------|-----------|------|--------------|
| ADCP   | CCL2      | 1    | -66.579      |
| ADCP   | CCL2      | 2    | -76.181      |
| ADCP   | CCL2      | 3    | -76.421      |
| ADCP   | CCL2      | 4    | -70.362      |
| ADCP   | CCL2      | 5    | -64.921      |
| ADCP   | CCL2      | 6    | -64.931      |
| ADCP   | CCL2      | 7    | -72.182      |
| ADCP   | CCL2      | 8    | -52.433      |
| ADCP   | CCL2      | 9    | -67.718      |
| ADCP   | CCL2      | 10   | -59.412      |
| ADCP   | CCL3      | 1    | -63.724      |
| ADCP   | CCL3      | 2    | -80.354      |
| ADCP   | CCL3      | 3    | -63.587      |
| ADCP   | CCL3      | 4    | -73.507      |
| ADCP   | CCL3      | 5    | -66.313      |
| ADCP   | CCL3      | 6    | -50.390      |
| ADCP   | CCL3      | 7    | -56.006      |
| ADCP   | CCL3      | 8    | -66.245      |
| ADCP   | CCL3      | 9    | -61.101      |
| ADCP   | CCL3      | 10   | -45.779      |
| ADCP   | CCL5      | 1    | -61.450      |
| ADCP   | CCL5      | 2    | -52.291      |
| ADCP   | CCL5      | 3    | -74.971      |
| ADCP   | CCL5      | 4    | -66.801      |
| ADCP   | CCL5      | 5    | -61.093      |
| ADCP   | CCL5      | 6    | -59.012      |
| ADCP   | CCL5      | 7    | -67.321      |
| ADCP   | CCL5      | 8    | -54.052      |
| ADCP   | CCL5      | 9    | -64.403      |
| ADCP   | CCL5      | 10   | -73.192      |

| Method | Chemokine | Rank | dG_cross |
|--------|-----------|------|----------|
| ADCP   | CCL7      | 1    | -78.344  |
| ADCP   | CCL7      | 2    | -44.944  |
| ADCP   | CCL7      | 3    | -54.433  |
| ADCP   | CCL7      | 4    | -62.307  |
| ADCP   | CCL7      | 5    | -62.046  |
| ADCP   | CCL7      | 6    | -59.925  |
| ADCP   | CCL7      | 7    | -60.735  |
| ADCP   | CCL7      | 8    | -57.171  |
| ADCP   | CCL7      | 9    | -53.523  |
| ADCP   | CCL7      | 10   | -57.840  |
| ADCP   | CCL8      | 1    | -78.777  |
| ADCP   | CCL8      | 2    | -57.479  |
| ADCP   | CCL8      | 3    | -59.036  |
| ADCP   | CCL8      | 4    | -43.707  |
| ADCP   | CCL8      | 5    | -46.076  |
| ADCP   | CCL8      | 6    | -59.917  |
| ADCP   | CCL8      | 7    | -63.846  |
| ADCP   | CCL8      | 8    | -59.833  |
| ADCP   | CCL8      | 9    | -65.773  |
| ADCP   | CCL8      | 10   | -68.998  |
| ADCP   | CXCL10    | 1    | -59.657  |
| ADCP   | CXCL10    | 2    | -49.184  |
| ADCP   | CXCL10    | 3    | -60.169  |
| ADCP   | CXCL10    | 4    | -55.894  |
| ADCP   | CXCL10    | 5    | -39.994  |
| ADCP   | CXCL10    | 6    | -52.237  |
| ADCP   | CXCL10    | 7    | -42.611  |
| ADCP   | CXCL10    | 8    | -54.275  |
| ADCP   | CXCL10    | 9    | -49.530  |
| ADCP   | CXCL10    | 10   | -65.629  |
| ADCP   | CXCL11    | 1    | -54.691  |
| ADCP   | CXCL11    | 2    | -47.716  |

| Method | Chemokine | Rank | dG_cross |
|--------|-----------|------|----------|
| ADCP   | CXCL11    | 3    | -58.574  |
| ADCP   | CXCL11    | 4    | -60.050  |
| ADCP   | CXCL11    | 5    | -56.787  |
| ADCP   | CXCL11    | 6    | -47.383  |
| ADCP   | CXCL11    | 7    | -51.849  |
| ADCP   | CXCL11    | 8    | -48.870  |
| ADCP   | CXCL11    | 9    | -54.059  |
| ADCP   | CXCL11    | 10   | -51.668  |
| ADCP   | CXCL6     | 1    | -62.304  |
| ADCP   | CXCL6     | 2    | -68.005  |
| ADCP   | CXCL6     | 3    | -57.081  |
| ADCP   | CXCL6     | 4    | -56.619  |
| ADCP   | CXCL6     | 5    | -64.228  |
| ADCP   | CXCL6     | 6    | -58.329  |
| ADCP   | CXCL6     | 7    | -50.751  |
| ADCP   | CXCL6     | 8    | -50.345  |
| ADCP   | CXCL6     | 9    | -62.787  |
| ADCP   | CXCL6     | 10   | -59.142  |
| AFM    | CCL2      | 0    | -61.016  |
| AFM    | CCL2      | 1    | -66.362  |
| AFM    | CCL2      | 2    | -62.620  |
| AFM    | CCL2      | 3    | -56.150  |
| AFM    | CCL2      | 4    | -57.081  |
| AFM    | CCL3      | 0    | -66.913  |
| AFM    | CCL3      | 1    | -55.862  |
| AFM    | CCL3      | 2    | -52.177  |
| AFM    | CCL3      | 3    | -49.282  |
| AFM    | CCL3      | 4    | -44.948  |
| AFM    | CCL5      | 0    | -56.264  |
| AFM    | CCL5      | 1    | -51.722  |
| AFM    | CCL5      | 2    | -48.543  |
| AFM    | CCL5      | 3    | -43.941  |

| Method | Chemokine | Rank | dG_cross |
|--------|-----------|------|----------|
| AFM    | CCL5      | 4    | -61.443  |
| AFM    | CCL7      | 0    | -64.503  |
| AFM    | CCL7      | 1    | -63.382  |
| AFM    | CCL7      | 2    | -65.303  |
| AFM    | CCL7      | 3    | -69.799  |
| AFM    | CCL7      | 4    | -63.075  |
| AFM    | CCL8      | 0    | -70.178  |
| AFM    | CCL8      | 1    | -72.505  |
| AFM    | CCL8      | 2    | -76.024  |
| AFM    | CCL8      | 3    | -77.569  |
| AFM    | CCL8      | 4    | -74.654  |
| AFM    | CXCL10    | 0    | -57.988  |
| AFM    | CXCL10    | 1    | -60.566  |
| AFM    | CXCL10    | 2    | -56.348  |
| AFM    | CXCL10    | 3    | -51.332  |
| AFM    | CXCL10    | 4    | -57.651  |
| AFM    | CXCL11    | 0    | -53.576  |
| AFM    | CXCL11    | 1    | -66.151  |
| AFM    | CXCL11    | 2    | -20.341  |
| AFM    | CXCL11    | 3    | -3.475   |
| AFM    | CXCL11    | 4    | -19.678  |
| AFM    | CXCL6     | 0    | -60.062  |
| AFM    | CXCL6     | 1    | -62.350  |
| AFM    | CXCL6     | 2    | -53.337  |
| AFM    | CXCL6     | 3    | -68.376  |
| AFM    | CXCL6     | 4    | -58.957  |
